# Supplementary material for: Establishing a System for Functional Characterization of Full-Length cDNAs of Camellia sinensis
Source: MDPI journal article supplement (doi:10.3390/ijms20235929), 2019-11-25
Supplement: s1 [file s1]

**Table S1.** Primer sequence of tea clone 2, 8, 9, 12, 21, 27, 28.

| Clone Number | Gene Bank<br>Accession Number | Forward/Reverse Primer<br>Sequence(5'-3')                              | CDS Length<br>(bp) |
|--------------|-------------------------------|------------------------------------------------------------------------|--------------------|
| 2            | MK795745                      | ATGGAGAACGCCGACGTGTTTGGCTCGT<br>TGATGCTCTTTGTATTCAATGCTCTTGT           | 868                |
| 8            | MK795749                      | ATGATGAATGAAAACATTTTCAT<br>TCAAGCTATTGGGTCTTTGTAGT                     | 684                |
| 9            | MN027185                      | ATGAAAACACAGCATCTTGATCTCAGT<br>TTACCTTCTGGATAAGAGTATCATCG              | 690                |
| 12           | MK795751                      | ATGGGTTGTTTTGTTGTAAGCCCTCGCTAT<br>CTAAGGCTGTGCAGGGAAGTCGTTAAATGTAT     | 879                |
| 21           | MK795756                      | ATGGGCTCCAAACAGTTCCAAGCTTCCTGTTGTA<br>TTACTTCTCTTCCATTCTCTTGGGGTGGCGTG | 768                |
| 27           | MK795760                      | ATGTTACGGTTCACACTTCGACGAGGAGGAGCGA<br>TCACATTGCATCAGCATGACAACTCATGAT   | 900                |
| 28           | MK795761                      | ATGGGTGGGTGTGAAGCAAACGA<br>TTAATATTGCTGGGTGGGGTTGAT                    | 516                |

**Table S2** Primer sequences of Cu signaling components in Arabidopsis

| Gene Name        | Accession Number | Primer sequence                                                                         |
|------------------|------------------|-----------------------------------------------------------------------------------------|
| <i>COPT1</i>     | AT5G59030        | Forward: 5'-GTTAATCCAAACCGCCGTGTA-3'<br>Reverse: 5'-CAGAGCGACGAGAAAACACACC-3'           |
| <i>COPT2</i>     | AT3G46900        | Forward: 5'-TCGCTCAAACCGCTGTGTAC-3'<br>Reverse: 5'-<br>AGAGAAAGAAACCAACGCCATAG-3'       |
| <i>COPT3</i>     | AT5G59040        | Forward: 5'-CCTTCACCATCATCGTTCTTCC-3'<br>Reverse: 5'-CGGCGAGACAGACCCAATAC-3'            |
| <i>COPT4</i>     | AT2G37925        | Forward: 5'-CTGACCGTGGGATGTATGCA-3'<br>Reverse: 5'-TCGGCACCCCTGTTTGATG-3'               |
| <i>COPT5</i>     | AT5G20650        | Forward: 5'-GAGAATCGCCGCATCCAAT-3'<br>Reverse: 5'-TGACGCCGAAAAGAAGAACC-3'               |
| <i>ZIP2</i>      | AT5G59520        | Forward: 5'-GTACGTTGCGGTAAACCATCTC-3'<br>Reverse: 5'-CGAGGAAGACGGCAATAAACTT-3'          |
| <i>ZIP4</i>      | AT1G10970        | Forward: 5'-<br>GCTCACCATAGGCATAGTCACTCT-3'<br>Reverse: 5'-CACAATCCCGAGCTCCAATAT-3'     |
| <i>COX17-1</i>   | AT3G15352        | Forward: 5'-GATTGATTCTCCACCCACTTC-3'<br>Reverse: 5'-ACATATCTCTTCTTTGGTTTCGTC-3'         |
| <i>COX17-2</i>   | AT1G53030        | Forward: 5'-GGACAAGCCAAGCAAAGATGT-3'<br>Reverse: 5'-GATTCACCGTGTTCTACAATGCA-3'          |
| <i>ATX1</i>      | AT1G66240        | Forward: 5'-TGTTCCAAGCCGTATCCTATCA-3'<br>Reverse: 5'-TCCACGCCTTCCATTTTCC-3'             |
| <i>CCS1</i>      | AT1G12520        | Forward: 5'-AGCAAAGTGGTCGAAAAGCTC-3'<br>Reverse: 5'-GGGCCTTTGAATTCTGCTACTG-3'           |
| <i>HMA1</i>      | AT4G37270        | Forward: 5'-TGGCCGCTCTTCCTTCAG-3'<br>Reverse: 5'-<br>GAGCGTAACTTGTTGATTAGATGAACT-3'     |
| <i>HMA5</i>      | AT1G63440        | Forward: 5'-GGAAGCCCGTTGTTGTGA-3'<br>Reverse: 5'-CCTTTGCTAACGGATGCTCACT-3'              |
| <i>HMA6/PAA1</i> | AT4G33520        | Forward: 5'-GTGGGCGTTCGGATACAAC-3'<br>Reverse: 5'-CTCTTTTGGTTCCGGTTTGAC-3'              |
| <i>HMA7/RAN1</i> | AT5G44790        | Forward: 5'-TGGTAGGAGACGGAATCAATGAC-3'<br>Reverse: 5'-<br>CGATGGCTGTTATAACGTCTTCTAAG-3' |
| <i>HMA8/PAA2</i> | AT5G21930        | Forward: 5'-GCTTTGTGCTCCTTGCTCGT-3'<br>Reverse: 5'-CAGAATCCACTGGGGTGTTATTG-3'           |
| <i>AP2M</i>      | AT5G46630        | Forward: 5'-TCGATTGCTTGTTTGAAGAT-3'<br>Reverse: 5'-TGTCCAAGATTCTTCTCTCCCAT-3'           |
